# Supplementary material for: Genome-Wide Identification and Analysis of the BBX Gene Family and Its Role in Carotenoid Biosynthesis in Wolfberry (Lycium barbarum L.)
Source: MDPI journal article supplement (doi:10.3390/ijms23158440), 2022-07-29
Supplement: s1 [file s1]

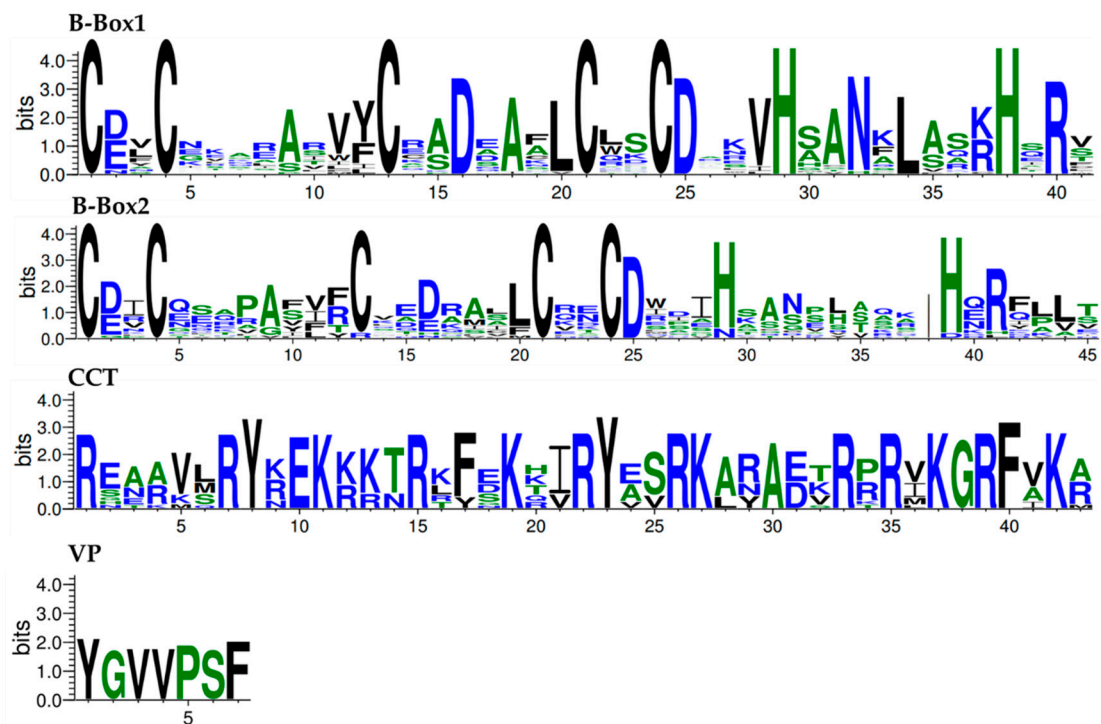

**Figure S1.** Domain compositions of LbaBBX proteins. The amino acid sequence alignment of the B-box1, B-box2, CCT, and VP domain. The x-axis indicated the conserved sequences of the domain and the conservation rate of each amino acid, respectively.

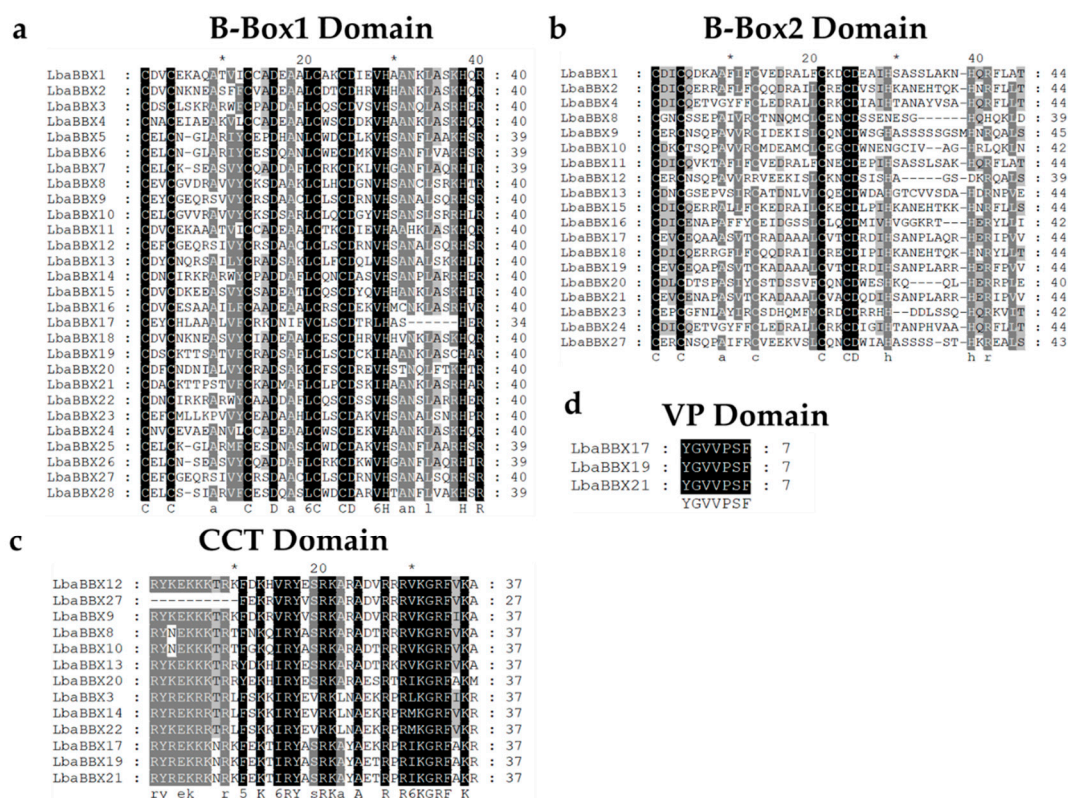

**Figure S2.** Multiple sequence alignments of the domains of the LbaBBX proteins. (a), (b), (c), and (d) represent the protein alignment of the B-Box 1, B-Box 2, CCT and VP domain, respectively. The identical conserved amino acids were represented by black and gray shaded.



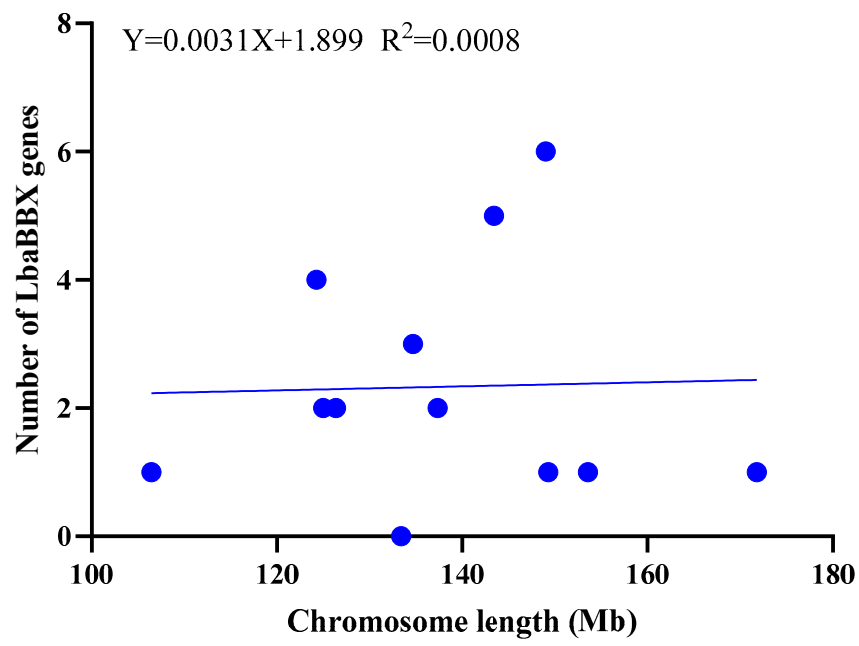

**Figure S4.** The Relationship between the numbers of *LbaBBX* genes and chromosome length.
